# Supplementary material for: Inhibition of Myeloperoxidase Activity in Cystic Fibrosis Sputum by Peptide Inhibitor of Complement C1 (PIC1)
Source: PLoS One. 2017 Jan 30;12(1):e0170203. doi: 10.1371/journal.pone.0170203 (PMC5279725; doi:10.1371/journal.pone.0170203)
Supplement: S2 Fig — (XLSX) [file pone.0170203.s002.xlsx]

## Sheet: Plate 1 - Sheet1
Fig 2A
PMN lysate (at 5 x 10E7 cells/ml. Used 20 ul + 20 ul PIC1, so 20 ul PMN would be 1 x 10E6 cells total)
PIC1: 20 mg/ml = 15 mM
PIC1		n=1	n=2	n=3	n=4
mg/ml	mM	1	3	5	9	AVG	SE	T-test
20	7.5	0.131	0.078	0.113	0.072	0.0985	0.0122193
10	3.8	0.177	0.146	0.117	0.098	0.1345	0.014952
5	1.9	0.164	0.203	0.121	0.112	0.15	0.0181831
2.5	0.9	0.235	0.169	0.131	0.205	0.185	0.0194808	1.54376e-05
1.25	0.5	0.485	0.255	0.206	0.433	0.34475	0.0585047
0.625	0.2	1.043	0.43	0.605	0.947	0.75625	0.124481
0.3125	0.1	0.725	0.699	1.138	1.138	0.925	0.106599
0	0	2.149	2.964	2.206	2.198	2.37925	0.169155
Fig 2B
pure MPO: 24 ug/ml
PIC1 (mM))	n=1	n=2	n=3	Avg	SE	T-test
7.5	0.043	0.044	0.051	0.046	0.00205724
3.75	0.041	0.042	0.044	0.0423333	0.000720936
1.875	0.041	0.043	0.069	0.051	0.0073723
0.9375	0.061	0.072	0.142	0.0916667	0.020736	0.00023162
0.46875	0.465	0.463	0.897	0.608333	0.117988
0.234	1.774	1.5	1.609	1.62767	0.0651076
0.117	2.637	2.271	1.661	2.18967	0.232705
0	2.878	2.713	2.108	2.56633	0.191339
Fig 2C
	ABTS
	n=1	n=2	n=3
PIC1 (mM)	1	2	3	avg	SE
7.5	0.136	0.136	0.146	0.139333	0.00272488
3.75	0.135	0.134	0.144	0.137667	0.00259937
1.875	0.136	0.138	0.142	0.138667	0.00144187
0.9375	0.142	0.143	0.15	0.145	0.00205724
0.468	0.184	0.178	0.169	0.177	0.00356325
0.234	0.37	0.301	0.254	0.308333	0.0275375
0.117	0.57	0.565	0.556	0.563667	0.00334839
0	1.054	0.961	1.003	1.006	0.0219805
	O-dianisidine
	n=1	n=2	n=3	avg	se
PIC1 (mM)	6	7	8	9	10
7.5	0.046	0.045	0.046	0.0456667	0.000272488
3.75	0.048	0.046	0.054	0.0493333	0.00196494
1.875	0.051	0.051	0.052	0.0513333	0.000272488
0.9375	0.057	0.055	0.059	0.057	0.000943927
0.468	0.08	0.085	0.095	0.0866667	0.00360468
0.234	0.393	0.315	0.431	0.379667	0.0279111
0.117	0.692	0.604	0.722	0.672667	0.0289454
0	1.131	1.126	1.132	1.12967	0.00151715
Fig 2D
		1.9 mM PIC1
	MPO mM	n=2	n=3	n=4	n=1	n=5	avg	se
	80	0.08	0.049	0.046	0.059	0.043	0.0554	0.00599346
	40	0.051	0.046	0.043	0.048	0.041	0.0458	0.00158215
	20	0.049	0.043	0.05	0.053	0.041	0.0472	0.00200446
	10	0.047	0.043	0.049	0.055	0.041	0.047	0.00218704
	5	0.048	0.049	0.05	0.054	0.048	0.0498	0.000994244
		0.95 mM PIC1
		n=2	n=3	n=4	n=1	n=5
	80	0.678	0.129	0.2149	0.279	0.163	0.29278	0.0889091
	40	0.125	0.068	0.117	0.103	0.1	0.1026	0.00873267
	20	0.088	0.052	0.09	0.09	0.07	0.078	0.00670535
	10	0.079	0.05	0.084	0.089	0.059	0.0722	0.00672553
	5	0.072	0.047	0.069	0.091	0.05	0.0658	0.00716181
		0.48 mM PIC1
		n=2	n=3	n=4	n=1	n=5
	80	3.255	1.091	1.742	1.42	1.339	1.7694	0.344376
	40	1.041	0.359	0.486	0.452	0.461	0.5598	0.109116
	20	0.301	0.156	0.231	0.293	0.267	0.2496	0.023568
	10	0.193	0.104	0.165	0.22	0.156	0.1676	0.0173789
	5	0.132	0.079	0.114	0.162	0.106	0.1186	0.0123253
		0.24 mM PIC1
		n=2	n=3	n=4	n=1	n=5
	80	3.779	2.526	3.49		2.793	3.147	0.25348
	40	1.994	0.92	1.053		1.29	1.31425	0.207113
	20	0.844	0.453	0.539		0.574	0.6025	0.0731082
	10	0.413	0.244	0.302		0.324	0.32075	0.0303755
	5	0.274	0.15	0.171		0.215	0.2025	0.0237395
		0 PIC1
		n=2	n=3	n=4	n=1	n=5
	80	4	4	3.997	3.818	3.982	3.9594	0.0317028
	40	3.349	2.243	2.539	2.044	2.641	2.5632	0.199271
	20	1.772	1.174	1.319	1.047	1.416	1.3456	0.110456
	10	0.897	0.61	0.684	0.54	0.752	0.6966	0.0548258
	5	0.448	0.347	0.321	0.296	0.445	0.3714	0.0283088
